# Supplementary material for: Development of ultraviolet-B long-lived persistent phosphors in Pr3+-doped garnets
Source: Royal Society of Chemistry journal article supplement (doi:10.1039/d1tc03819b), 2021-01-01
Supplement: d1tc03819b1.pdf [file d1tc03819b1.pdf]

## Supporting Information

**Title:** Development of ultraviolet-B long persistent phosphors in Pr<sup>3+</sup>-doped garnets

**Author(s):** Shao Yan, Yanjie Liang,\* Jingwei Liu, Dongxun Chen, Shihai Miao, Jianqiang Bi and Kangning Sun

Key Laboratory for Liquid-Solid Structure Evolution and Processing of Materials,  
Ministry of Education, Shandong University, Jinan 250061, China.

\*Corresponding author: YJ Liang

E-mail: [yanjie.liang@sdu.edu.cn](mailto:yanjie.liang@sdu.edu.cn)

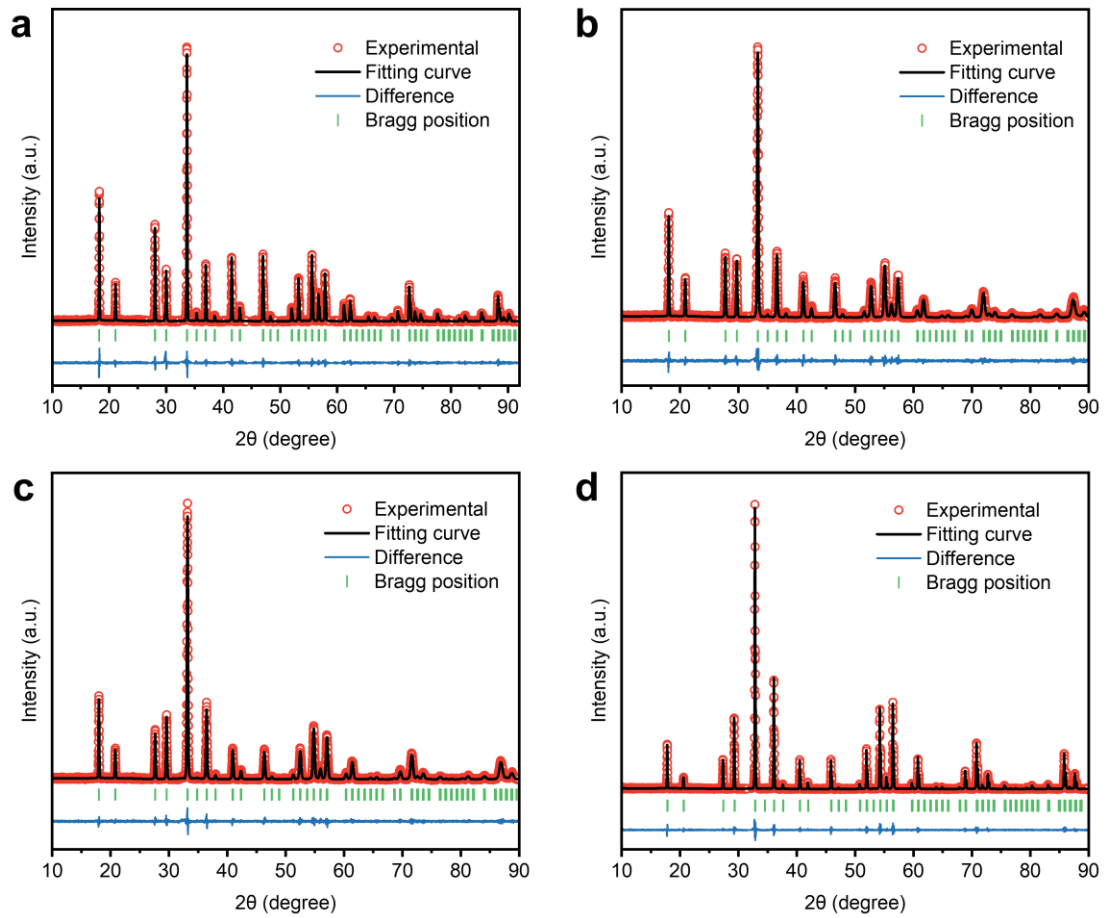

**Fig. S1** The Rietveld refinement of the powder XRD pattern of Lu<sub>3</sub>Al<sub>5</sub>O<sub>12</sub>:0.5%Pr<sup>3+</sup> (a), Lu<sub>3</sub>Al<sub>3</sub>Ga<sub>2</sub>O<sub>12</sub>:0.5%Pr<sup>3+</sup> (b), Lu<sub>3</sub>Al<sub>2</sub>Ga<sub>3</sub>O<sub>12</sub>:0.5%Pr<sup>3+</sup> (c), and Lu<sub>3</sub>Ga<sub>5</sub>O<sub>12</sub>:0.5%Pr<sup>3+</sup> (d).

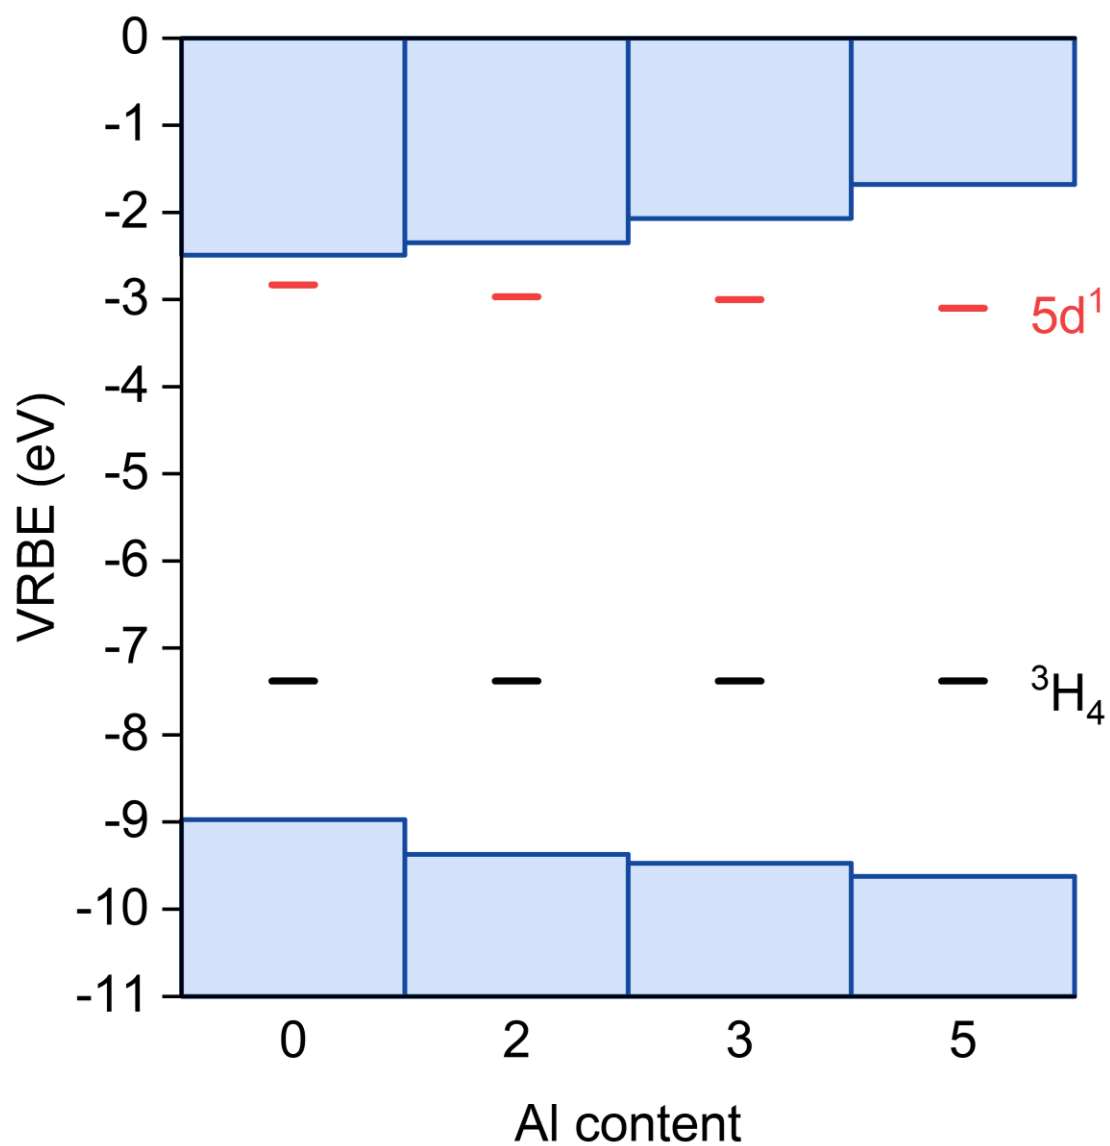

**Fig. S2** Effect of the Al/Ga ratio on the VRBE scheme in Lu<sub>3</sub>Al<sub>x</sub>Ga<sub>5-x</sub>O<sub>12</sub>:Pr<sup>3+</sup> ( $x = 0, 2, 3, 5$ ) garnet compounds.

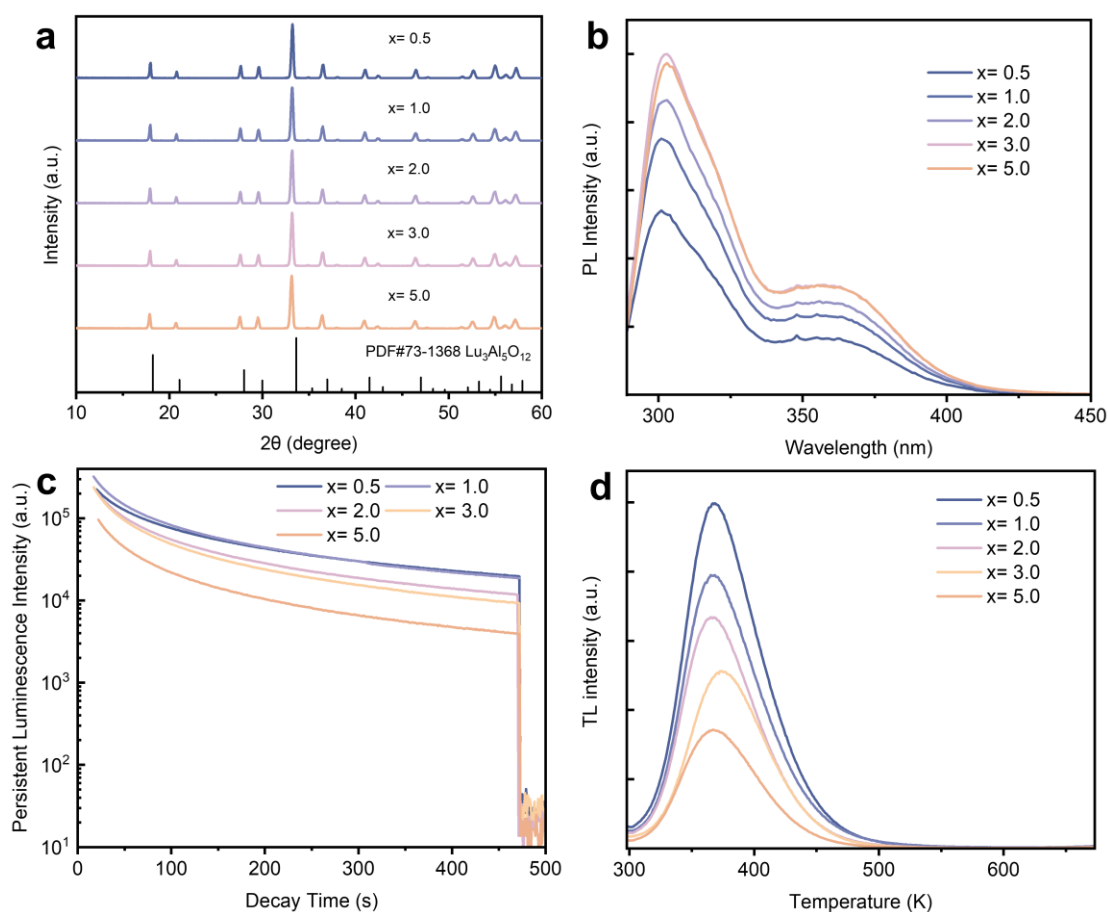

**Fig. S3** (a) XRD patterns of Lu<sub>3</sub>Al<sub>3</sub>Ga<sub>2</sub>O<sub>12</sub>:x%Pr<sup>3+</sup> ( $x = 0.5, 1, 2, 3, 5$ ). (b) Photoluminescence emission spectra of Lu<sub>3</sub>Al<sub>3</sub>Ga<sub>2</sub>O<sub>12</sub>:x%Pr<sup>3+</sup> ( $x = 0.5, 1, 2, 3, 5$ ). The emission spectra were obtained upon 279 nm excitation. (c) Persistent luminescence decay curves of Lu<sub>3</sub>Al<sub>3</sub>Ga<sub>2</sub>O<sub>12</sub>:x%Pr<sup>3+</sup> ( $x = 0.5, 1, 2, 3, 5$ ) phosphors at room temperature. The decay curves were monitored at 302 nm after irradiation by a 254 nm UV lamp for 10 min. (d) TL curves of Lu<sub>3</sub>Al<sub>3</sub>Ga<sub>2</sub>O<sub>12</sub>:x%Pr<sup>3+</sup> ( $x = 0.5, 1, 2, 3, 5$ ). The samples were pre-irradiated by 254 nm UV lamp for 10 min.

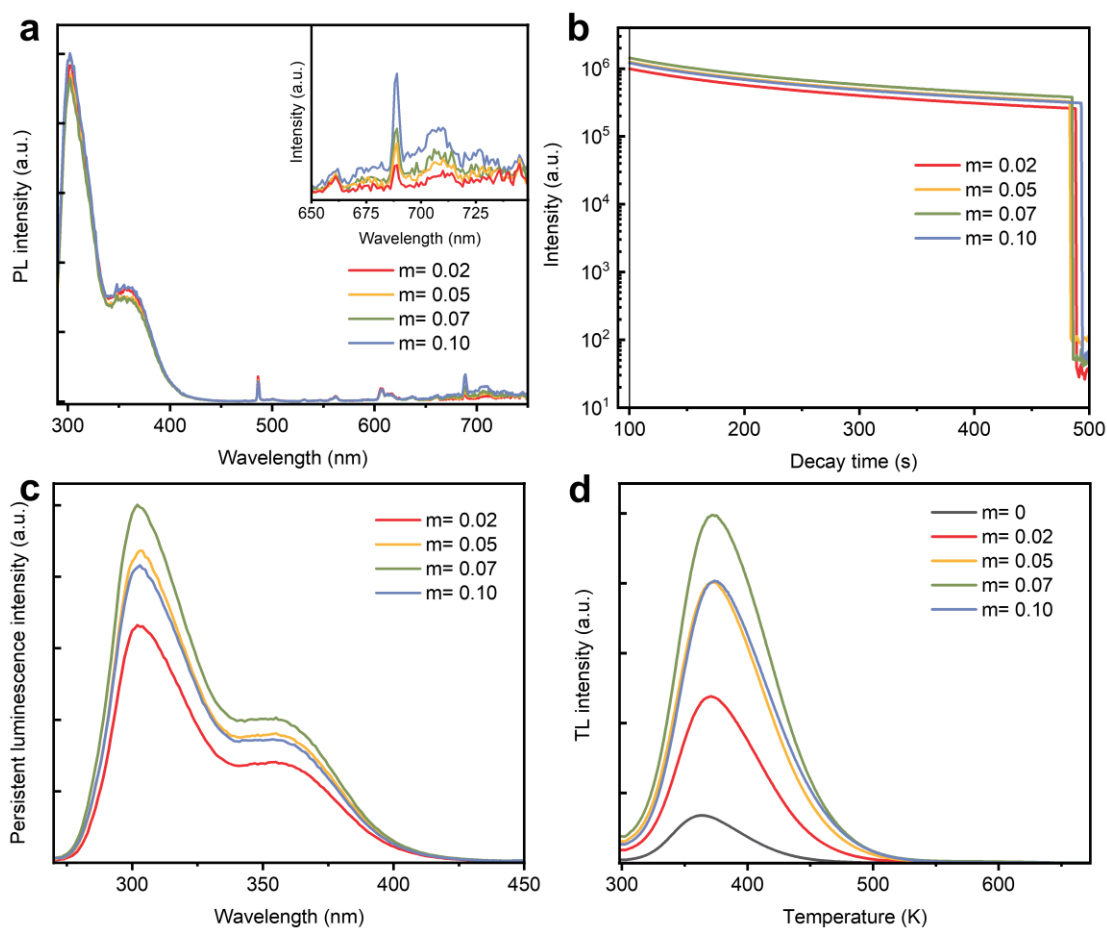

**Fig. S4** (a) Emission spectra of  $\text{Lu}_3\text{Al}_3\text{Ga}_2\text{O}_{12}:0.5\%\text{Pr}^{3+}, m\%\text{Cr}^{3+}$  ( $m = 0.02, 0.05, 0.07, 0.10$ ). All the emission spectra were obtained with the excitation wavelength of 279 nm light. (b, c) Persistent luminescence decay curves and persistent luminescence emission spectra of  $\text{Lu}_3\text{Al}_3\text{Ga}_2\text{O}_{12}:0.5\%\text{Pr}^{3+}, m\%\text{Cr}^{3+}$  ( $m = 0.02, 0.05, 0.07, 0.10$ ). The discs were monitored at 302 nm after pre-irradiated by 254 nm UV lamp for 10 min. The persistent luminescence emission spectra were obtained after 10 min decay. (d) Thermoluminescence curves of  $\text{Lu}_3\text{Al}_3\text{Ga}_2\text{O}_{12}:0.5\%\text{Pr}^{3+}, m\%\text{Cr}^{3+}$  ( $m = 0, 0.02, 0.05, 0.07, 0.10$ ).

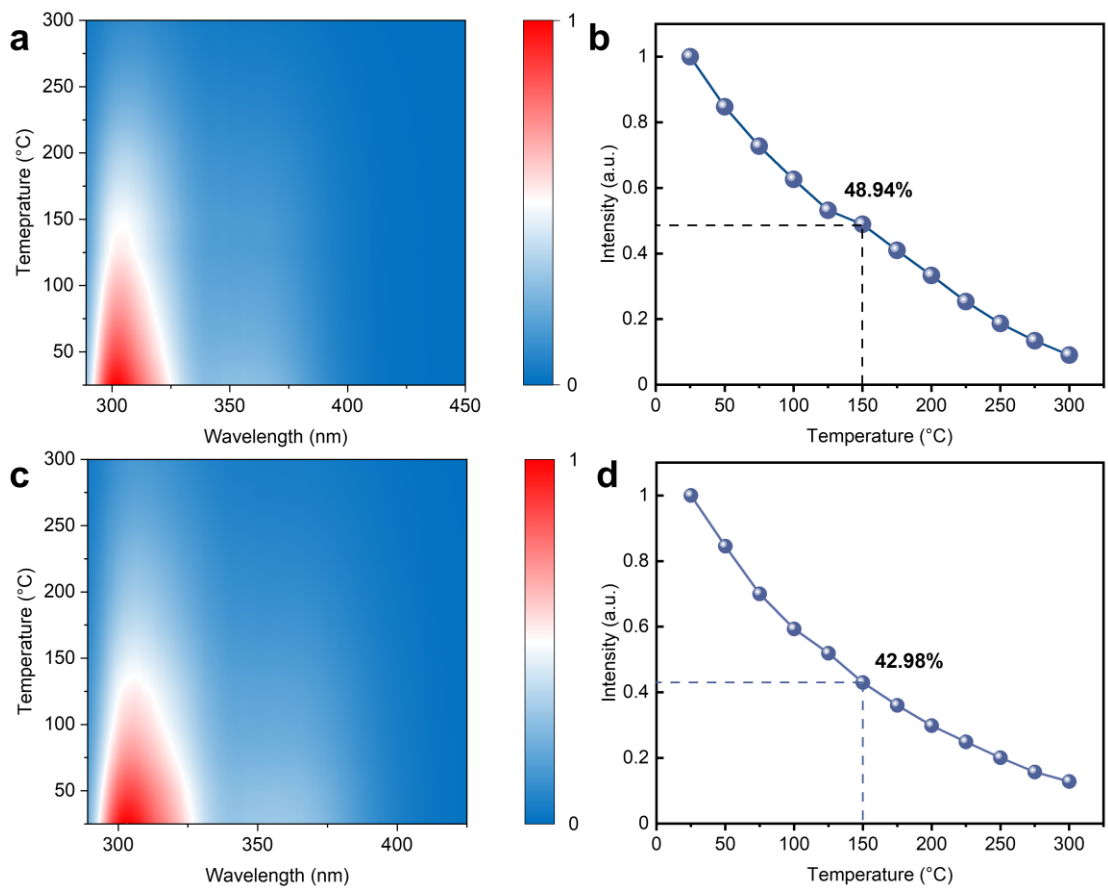

**Fig. S5** (a) 2D color maps of temperature-dependent emission spectra of LAGG:Pr phosphor. (b) Normalized emission intensities of LAGG:Pr monitored at 302 nm as a function of temperature. (c) 2D color maps of temperature-dependent emission spectra of LAGG:Pr,Cr phosphor. (d) Normalized emission intensities of LAGG:Pr,Cr monitored at 302 nm as a function of temperature.

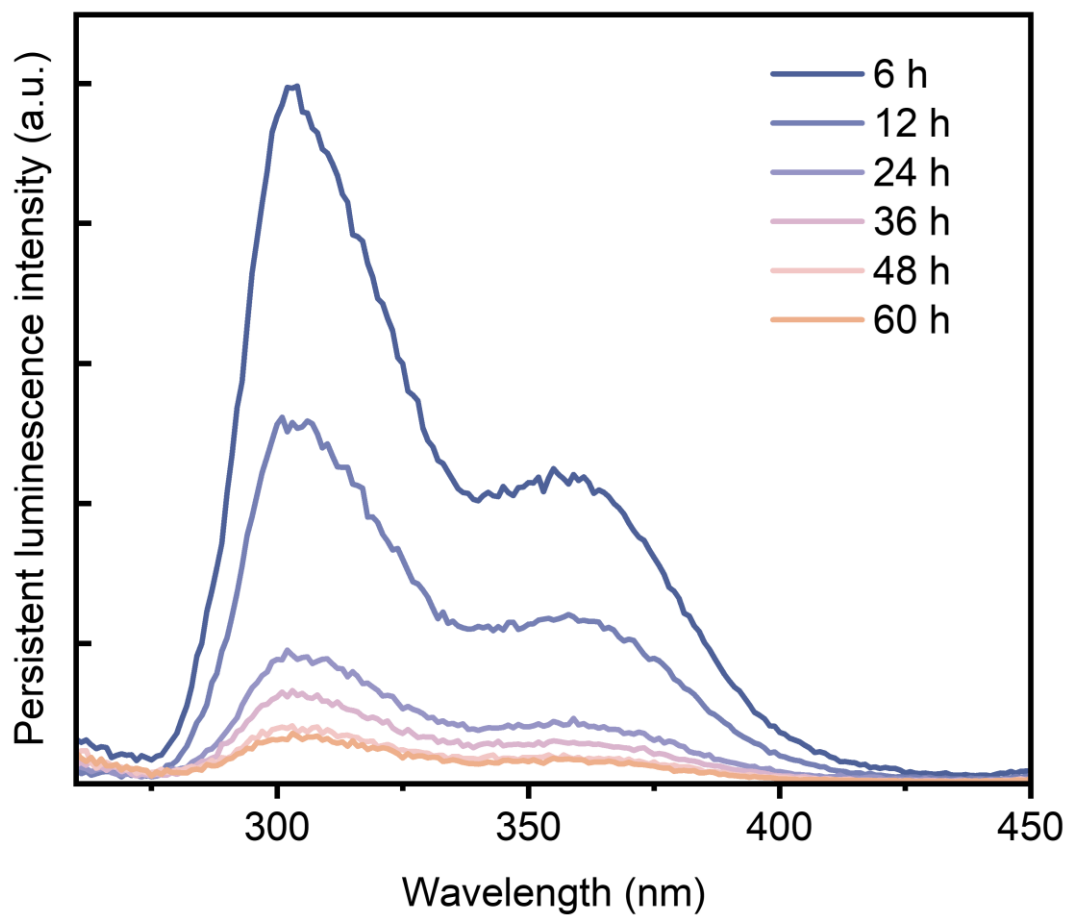

**Fig. S6** Persistent luminescence emission spectra of LAGG:Pr,Cr phosphor at different decay time. The sample was pre-irradiated by 254 nm UV lamp for 15 min.

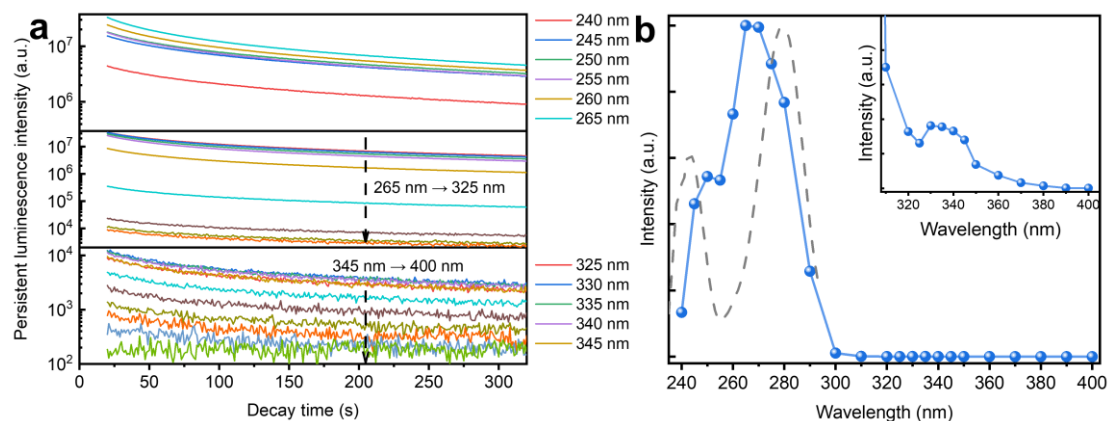

**Fig. S7** (a) Room temperature persistent luminescence decay curves of LAGG:Pr,Cr phosphor irradiated by monochromatic light between 240–400 nm for 5 min. The monitoring wavelength is 302 nm. The persistent luminescence intensity at 20 s was used to plot the persistent luminescence intensity as a function of excitation wavelength shown in Fig. S7b. (b) Persistent luminescence excitation spectrum (blue ball curve) and photoluminescence excitation spectrum (grey dash curve) of LAGG:Pr,Cr. The upper inset is the zoom-in spectrum between 310–400 nm.



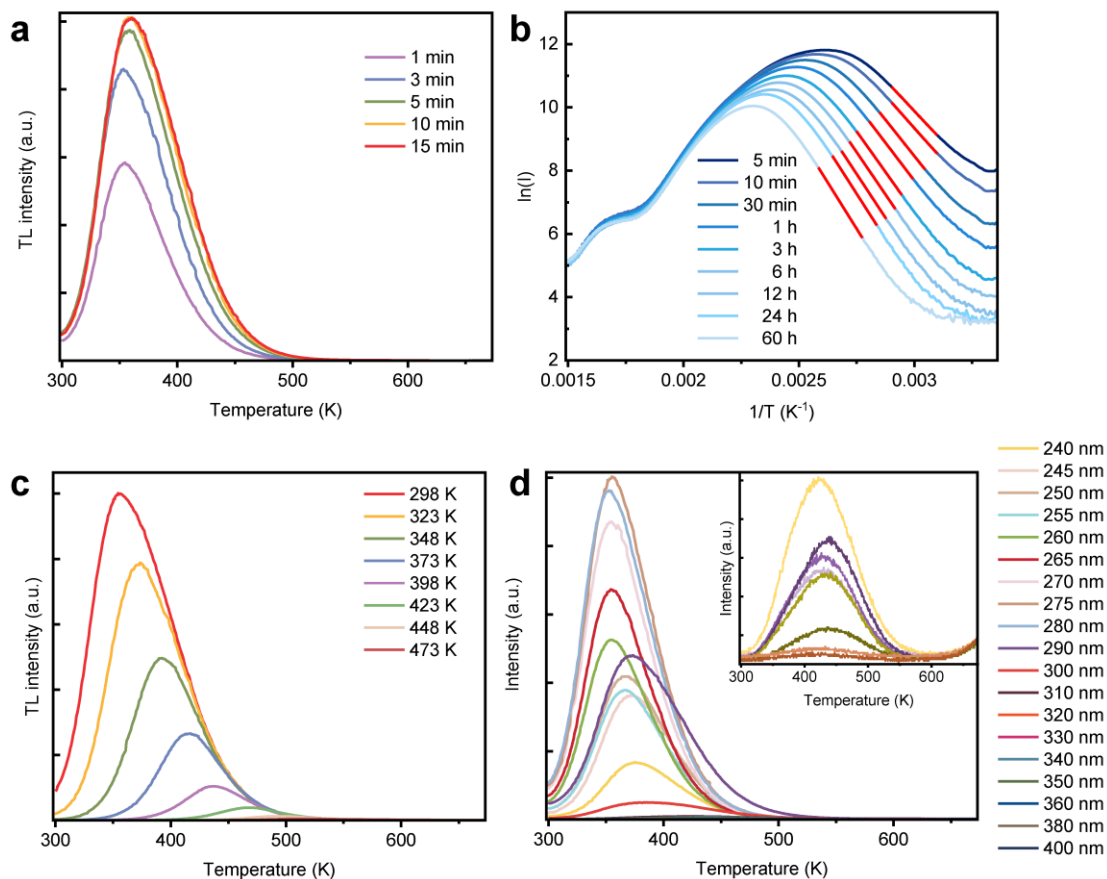

**Fig. S8** (a) Thermoluminescence curves of LAGG:Pr,Cr after pre-irradiated by 254 nm UV lamp for different times. (b) TL curves analyzed by the initial rise method in the LAGG:Pr,Cr phosphor. The depth of the shallowest occupied trap for each curve was estimated according to the slope of fitting red straight lines. (c) Thermoluminescence curves obtained on the LAGG:Pr,Cr sample underwent thermal cleaning at different temperatures. (d) Thermoluminescence curves with an excitation wavelength from 240 to 400 nm of LAGG:Pr,Cr. The sample was pre-irradiated for 10 min at each measured wavelength using a xenon arc lamp.

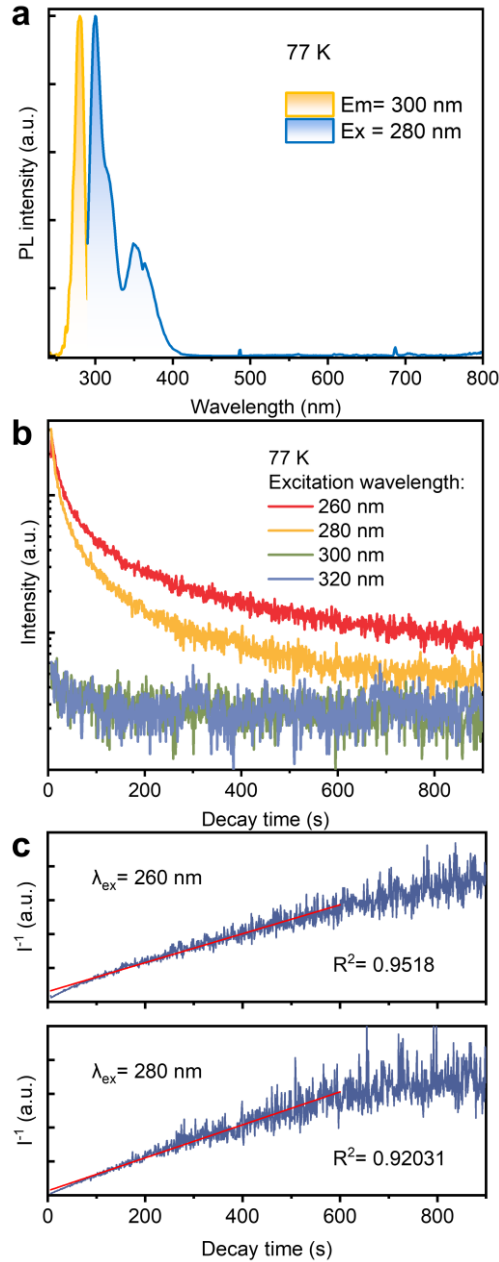

**Fig. S9** (a) Photoluminescence excitation and emission spectra of LAGG:Pr,Cr phosphor at 77K. (b) Persistent luminescence decay curves of LAGG:Pr,Cr at 77 K after pre-irradiated by the monochromatic light (260, 280, 300 nm, and 320 nm) for 10 min at 77 K. (c) The reciprocal of the persistent luminescence intensity ( $I^{-1}$ ) versus decay time ( $t$ ) after irradiation by 260 nm and 280 nm UV light for 15 min at 77 K.

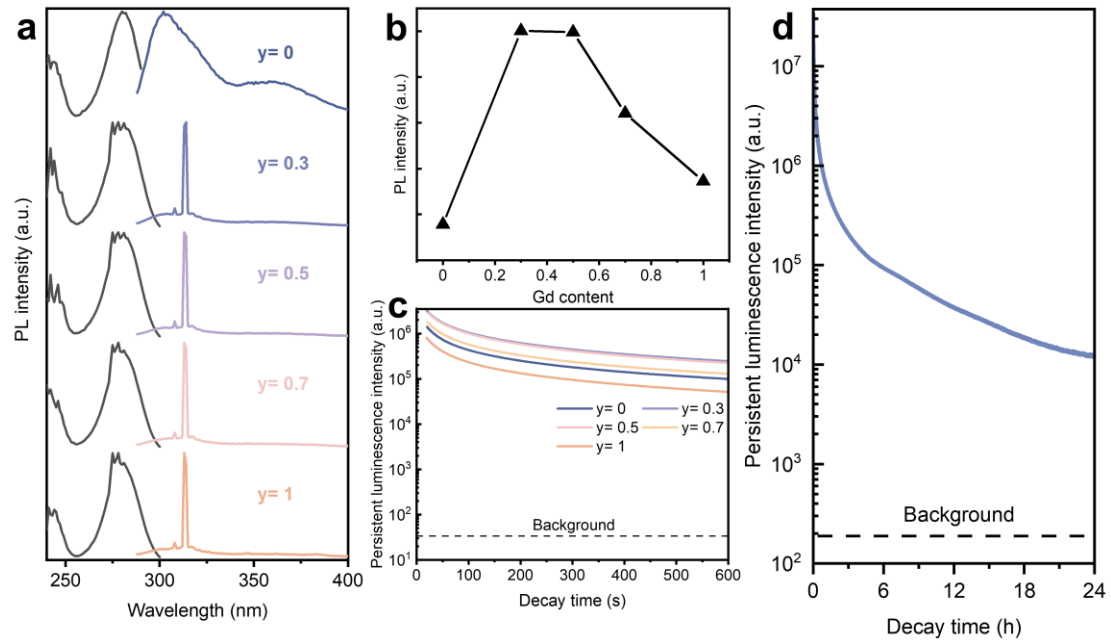

**Fig. S10** (a) Normalized photoluminescence excitation and emission spectra of  $\text{Lu}_{3-y}\text{Gd}_y\text{Al}_3\text{Ga}_2\text{O}_{12}:0.5\%\text{Pr}^{3+},0.07\%\text{Cr}^{3+}$  ( $y = 0, 0.3, 0.5, 0.7, 1$ ). (b) Emission intensity at 313 nm as a function of Gd contents. (c) Persistent luminescence decay curves of  $\text{Lu}_{3-y}\text{Gd}_y\text{Al}_3\text{Ga}_2\text{O}_{12}:0.5\%\text{Pr}^{3+},0.07\%\text{Cr}^{3+}$  ( $y = 0, 0.3, 0.5, 0.7, 1$ ). The discs were pre-irradiated by a 254 nm UV lamp for 10 min. (d) Long-lasting persistent luminescence decay curve of  $\text{Lu}_{2.7}\text{Gd}_{0.3}\text{Al}_3\text{Ga}_2\text{O}_{12}:0.5\%\text{Pr}^{3+},0.07\%\text{Cr}^{3+}$  phosphor. Before measurement, the sample was irradiated by 254 nm UV lamp for 15 min to fully fill the traps.

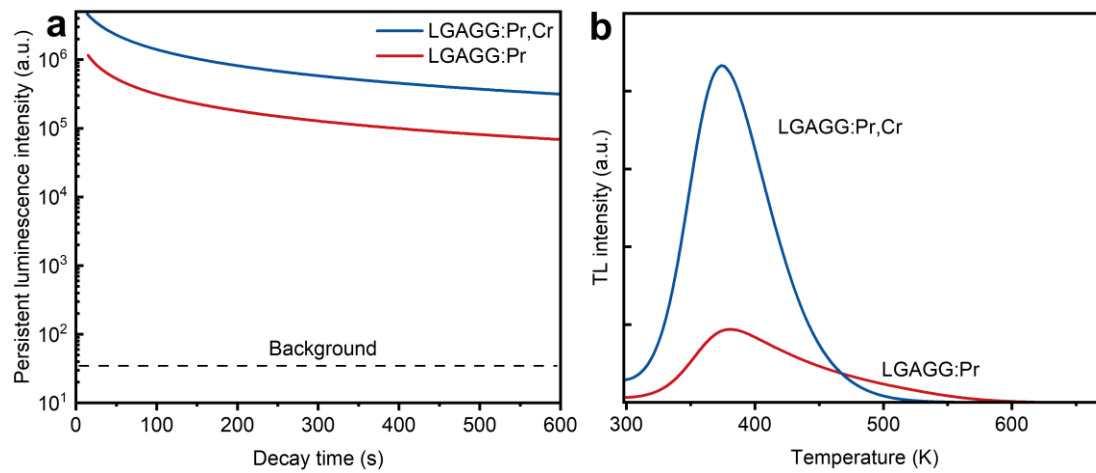

**Fig. S11** (a) Persistent luminescence decay curves monitored at 313 nm for LGAGG:Pr and LGAGG:Pr,Cr phosphors. The samples were pre-irradiated by a 254 nm UV lamp for 10 min. (b) TL curves of LGAGG:Pr and LGAGG:Pr,Cr phosphors after being irradiated by a 254 nm UV lamp for 10 min.

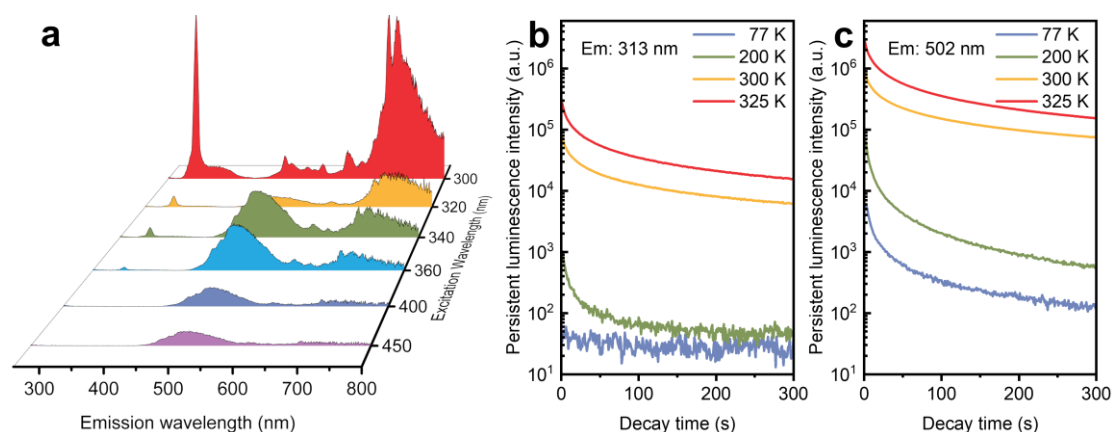

**Fig. S12** (a) Persistent luminescence emission spectra of LGAGG:Pr,Cr phosphor after irradiated by different monochromatic light for 10 min. (b, c) Persistent luminescence decay curves of LGAGG:Pr,Cr measured at different temperatures from 77 K to 325 K. The curves were monitored at 313 nm (b) and 502 nm (c) after irradiation by 340 nm monochromatic light for 10 min.

**Table S1** Experimental and computational data used to construct the VRBE diagram of the  $\text{Lu}_3(\text{Al,Ga})_5\text{O}_{12}$  series garnet compounds (in eV).

| Host lattice                                     | U(6,A) | $E_{\text{Eu}^{2+}}^{4f}$ | $E_{\text{Eu}^{3+}}^{4f}$ | $E_{\text{Eu}^{3+},\text{CT}}$ | $E_{\text{V}}$ | $E^{\text{ex}}$ | $E_{\text{CV}}$ | $E_{\text{C}}$ | $E_{\text{Pr}^{3+}}^{4f}$ | $E_{\text{Pr}^{3+}}^{5d}$ |
|--------------------------------------------------|--------|---------------------------|---------------------------|--------------------------------|----------------|-----------------|-----------------|----------------|---------------------------|---------------------------|
| $\text{Lu}_3\text{Al}_5\text{O}_{12}$            | 6.8    | -3.97                     | -10.77                    | 5.65                           | -9.62          | 7.35            | 7.94            | -1.68          | -7.38                     | -3.10                     |
| $\text{Lu}_3\text{Al}_3\text{Ga}_2\text{O}_{12}$ | 6.8    | -3.97                     | -10.77                    | 5.49                           | -9.46          | 6.85            | 7.40            | -2.07          | -7.38                     | -3.00                     |
| $\text{Lu}_3\text{Al}_2\text{Ga}_3\text{O}_{12}$ | 6.8    | -3.97                     | -10.77                    | 5.40                           | -9.37          | 6.50            | 7.02            | -2.35          | -7.38                     | -2.97                     |
| $\text{Lu}_3\text{Ga}_5\text{O}_{12}$            | 6.8    | -3.97                     | -10.77                    | 5.00                           | -8.97          | 6.00            | 6.48            | -2.49          | -7.38                     | -2.83                     |

**Table S2** Rietveld refinement parameters of  $\text{Lu}_3\text{Al}_x\text{Ga}_{5-x}\text{O}_{12}:0.5\%\text{Pr}^{3+}$  ( $x= 0, 2, 3, 5$ ) phosphors.

| Sample                        | $\text{Lu}_3\text{Al}_5\text{O}_{12}:\text{Pr}^{3+}$ | $\text{Lu}_3\text{Al}_3\text{Ga}_2\text{O}_{12}:\text{Pr}^{3+}$ | $\text{Lu}_3\text{Al}_2\text{Ga}_3\text{O}_{12}:\text{Pr}^{3+}$ | $\text{Lu}_3\text{Ga}_5\text{O}_{12}:\text{Pr}^{3+}$ |
|-------------------------------|------------------------------------------------------|-----------------------------------------------------------------|-----------------------------------------------------------------|------------------------------------------------------|
| Space group                   | Ia-3d                                                | Ia-3d                                                           | Ia-3d                                                           | Ia-3d                                                |
| $\alpha = \beta = \gamma$ (°) | 90                                                   | 90                                                              | 90                                                              | 90                                                   |
| a= b= c (Å)                   | 11.92026(4)                                          | 12.02269(8)                                                     | 12.08188(7)                                                     | 12.187200(26)                                        |
| V (Å <sup>3</sup> )           | 1693.779(10)                                         | 1737.823(20)                                                    | 1763.613(17)                                                    | 1810.138(7)                                          |
| R <sub>wp</sub>               | 13.31%                                               | 12.94%                                                          | 12.42%                                                          | 14.20%                                               |
| R <sub>p</sub>                | 9.17%                                                | 9.31%                                                           | 8.58%                                                           | 10.11%                                               |
| $\chi^2$                      | 1.309                                                | 1.240                                                           | 1.181                                                           | 1.491                                                |

**Table S3** UVB persistent luminescence power intensities measured by Newport power meter.

| Decay time (s) | Intensity (mW m <sup>-2</sup> ) |
|----------------|---------------------------------|
| 5              | 19.76                           |
| 10             | 14.00                           |
| 30             | 7.41                            |
| 60             | 4.62                            |
| 180            | 2.06                            |
| 300            | 1.31                            |
| 600            | 0.65                            |
| 900            | 0.44                            |



**Table S4** Comparison of the reported UV persistent phosphors.

| Material                                                                                            | Maximum emission | Irradiance                       | Ref. (in text) |
|-----------------------------------------------------------------------------------------------------|------------------|----------------------------------|----------------|
| Ca <sub>2</sub> Al <sub>2</sub> SiO <sub>7</sub> :Pr <sup>3+</sup>                                  | 268 nm           | 4.8 mW m <sup>-2</sup> at 10 s   | 1              |
| Y <sub>3</sub> Ga <sub>5</sub> O <sub>12</sub> :Bi <sup>3+</sup>                                    | 313 nm           | 5.7 mW m <sup>-2</sup> at 10 s   | 2              |
| LiYGeO <sub>4</sub> :Bi <sup>3+</sup>                                                               | 365 nm           | 11.83 mW m <sup>-2</sup> at 10 s | 3              |
| Cs <sub>2</sub> NaYF <sub>6</sub> :Pr <sup>3+</sup>                                                 | 270 nm           | 14.9 mW m <sup>-2</sup> at 30 s  | 4              |
| Lu <sub>2</sub> SiO <sub>5</sub> :Pr <sup>3+</sup>                                                  | 270 nm           | 6.98 mW m <sup>-2</sup> at 15s   | 5              |
| Lu <sub>3</sub> Al <sub>3</sub> Ga <sub>2</sub> O <sub>12</sub> :Pr <sup>3+</sup> ,Cr <sup>3+</sup> | 302 nm           | 14.00 mW m <sup>-2</sup> at 10 s | This work      |

- [1] X. Wang, Y. Chen, F. Liu and Z. Pan, *Nat. Commun.*, 2020, **11**, 2040.
- [2] J. Liu, Y. Liang, S. Yan, D. Chen, S. Miao, W. Wang and J. Bi, *J. Mater. Chem. C*, 2021, **9**, 9692-9701.
- [3] J. Shi, X. Sun, S. Zheng, X. Fu, Y. Yang, J. Wang and H. Zhang, *Adv. Opt. Mater.*, 2019, **7**, 1900526.
- [4] Y. Yang, Z. Li, J. Zhang, Y. Lu, S. Guo, Q. Zhao, X. Wang, Z. Yong, H. Li, J. Ma, Y. Kuroiwa, C. Moriyoshi, L. Hu, L. Zhang, L. Zheng and H. Sun, *Light Sci. Appl.*, 2018, **7**, 88.
- [5] S. Yan, Y. Liang, Y. Chen, J. Liu, D. Chen and Z. Pan, *Dalton Trans.*, 2021, **50**, 8457-8466.
